# Supplementary material for: Genetic analysis of vancomycin-variable Enterococcus faecium clinical isolates in Italy
Source: PubMed Central journal article supplement (PMC10965585; doi:10.1007/s10096-024-04768-0), 2024-01-31

**Figure S2.** Maximum likelihood phylogenetic tree of the 7 VVEI $\alpha$ -S and *E. faecium* 741160 strains. The PFGE pulsotypes and the sequence type (ST) of each isolate are shown. Ef indicate *Enterococcus faecium*.

Tree scale: 0.1

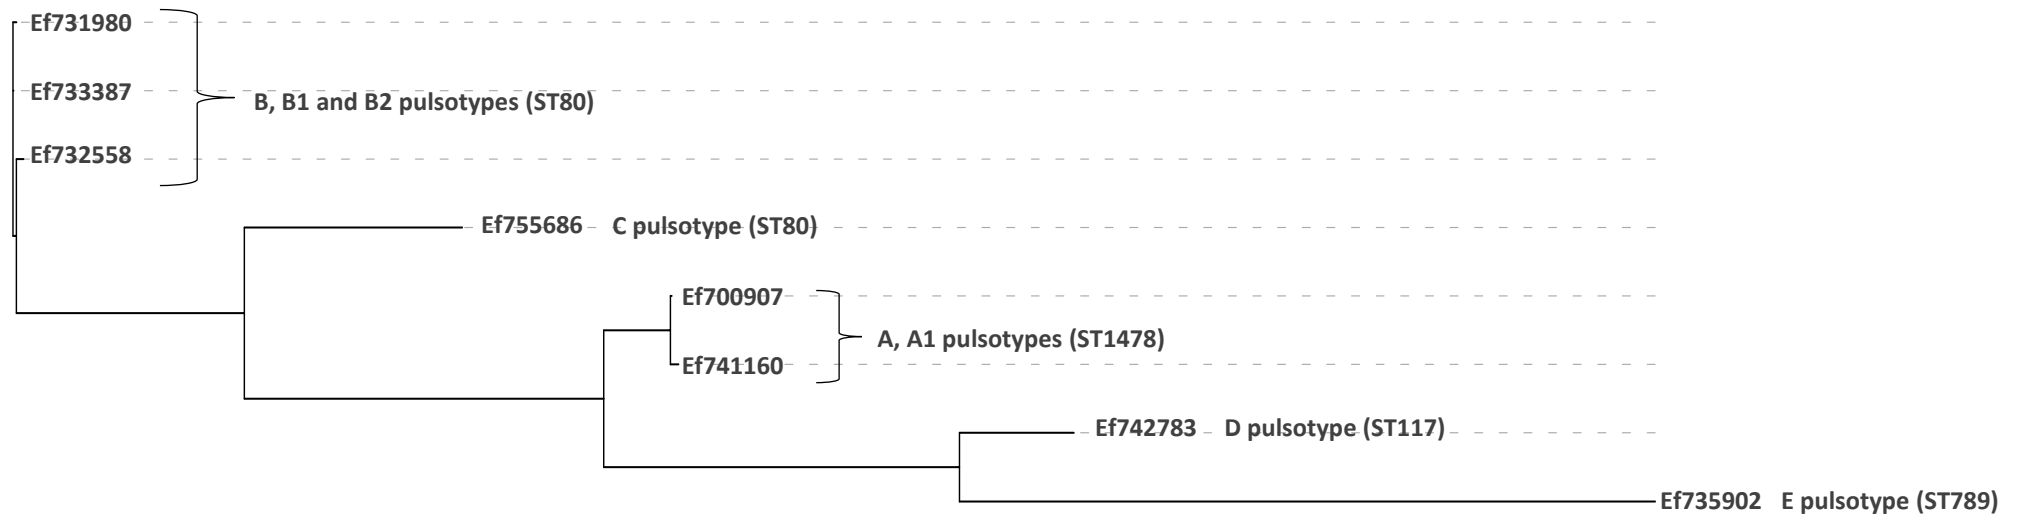

Supplement: 10096_2024_4768_MOESM6_ESM.pdf [file 10096_2024_4768_MOESM6_ESM.pdf]
