# Supplementary material for: Genetic analysis of vancomycin-variable Enterococcus faecium clinical isolates in Italy
Source: PubMed Central journal article supplement (PMC10965585; doi:10.1007/s10096-024-04768-0), 2024-01-31
Supplement: 10096_2024_4768_MOESM7_ESM.pdf [file 10096_2024_4768_MOESM7_ESM.pdf]

**Table S1.** Single-nucleotide polymorphism (SNPs) of sequenced VVE isolates.

| <b>Isolates</b> | <b>700907</b> | <b>731980</b> | <b>732558</b> | <b>733387</b> | <b>735902</b> | <b>741160</b> | <b>742783</b> | <b>755686</b> |
|-----------------|---------------|---------------|---------------|---------------|---------------|---------------|---------------|---------------|
| 700907          | 0             | 2107          | 2125          | 2093          | 2804          | 47            | 1833          | 2101          |
| 731980          | 2107          | 0             | 52            | 18            | 3746          | 2134          | 2870          | 1587          |
| 732558          | 2125          | 52            | 0             | 70            | 3762          | 2152          | 2890          | 1597          |
| 733387          | 2093          | 18            | 70            | 0             | 3762          | 2126          | 2886          | 1603          |
| 735902          | 2804          | 3746          | 3762          | 3762          | 0             | 2831          | 2378          | 3454          |
| 741160          | 47            | 2134          | 2152          | 2126          | 2831          | 0             | 1856          | 2126          |
| 742783          | 1833          | 2870          | 2890          | 2886          | 2378          | 1856          | 0             | 2716          |
| 755686          | 2101          | 1587          | 1597          | 1603          | 3454          | 2126          | 2716          | 0             |

SNPs min: 18 max: 3762
